# Supplementary material for: Resazurin-based high-throughput screening method for the discovery of dietary phytochemicals to target microbial transformation of l-carnitine into trimethylamine, a gut metabolite associated with cardiovascular disease
Source: Royal Society of Chemistry journal article supplement (doi:10.1039/d2fo00103a), 2022-01-01
Supplement: d2fo00103a1.pdf [file d2fo00103a1.pdf]

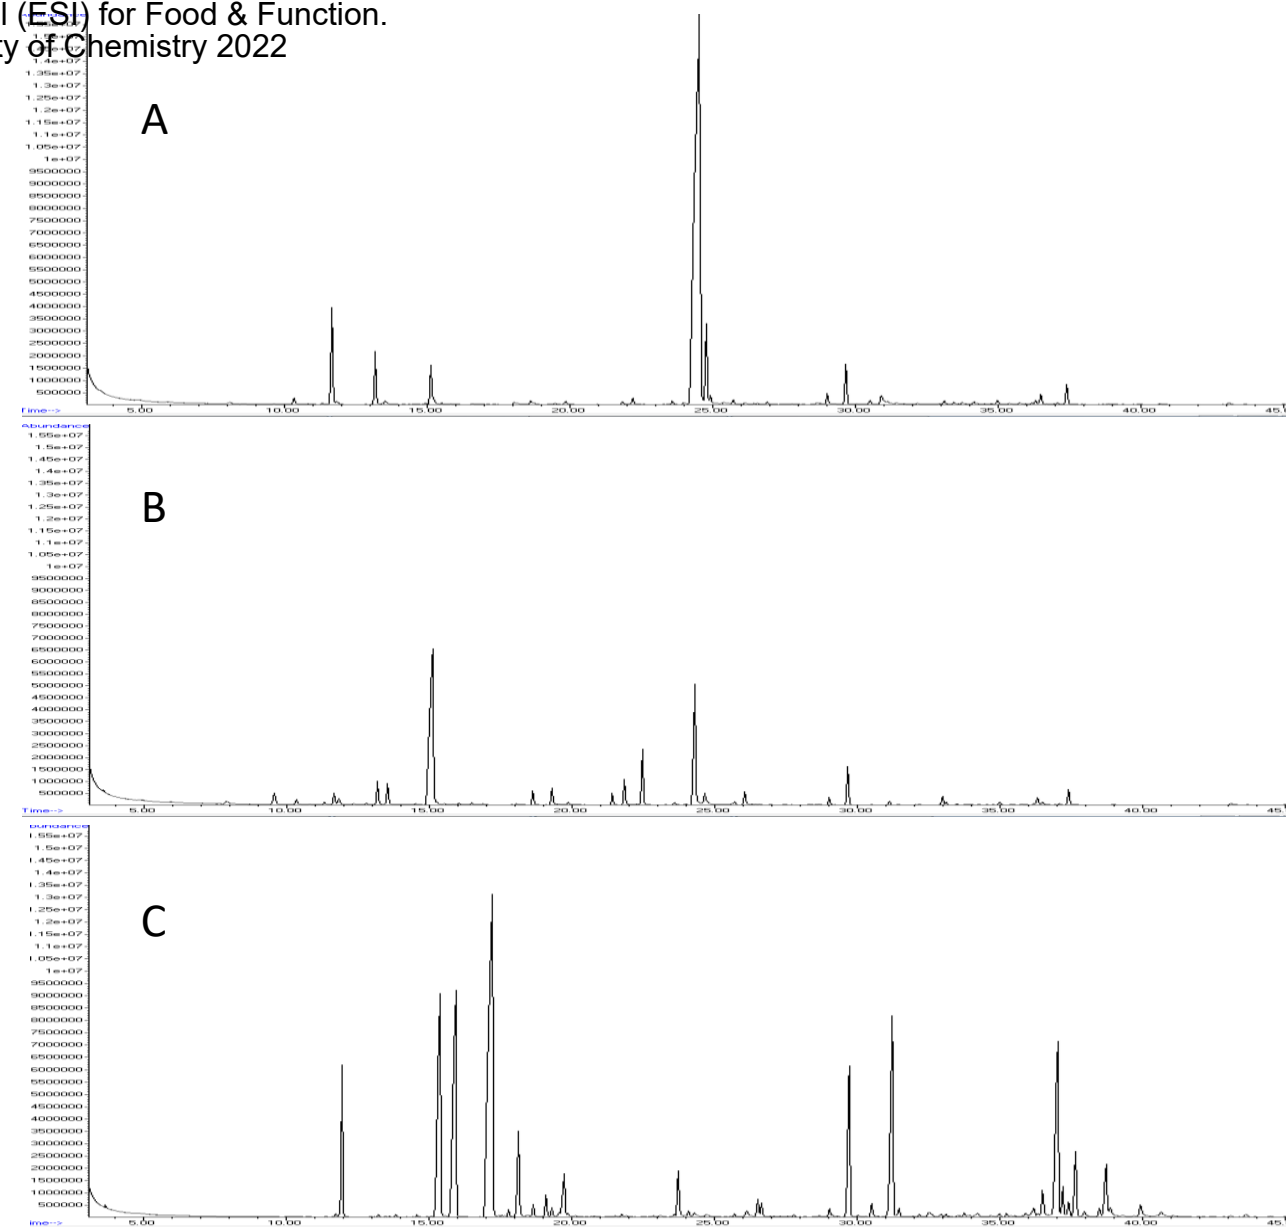

**Figure S1.** Chromatograms obtained by GC-MS analysis of (A) 2,5 mg/mL red thyme (hexane extract), (B) 2,5 mg/mL oregano (hexane extract), and (C) 5 mg/mL sage (SFE 100 extract).

Initial bacterial load:  $1.3 \cdot 10^6$  cfu/mL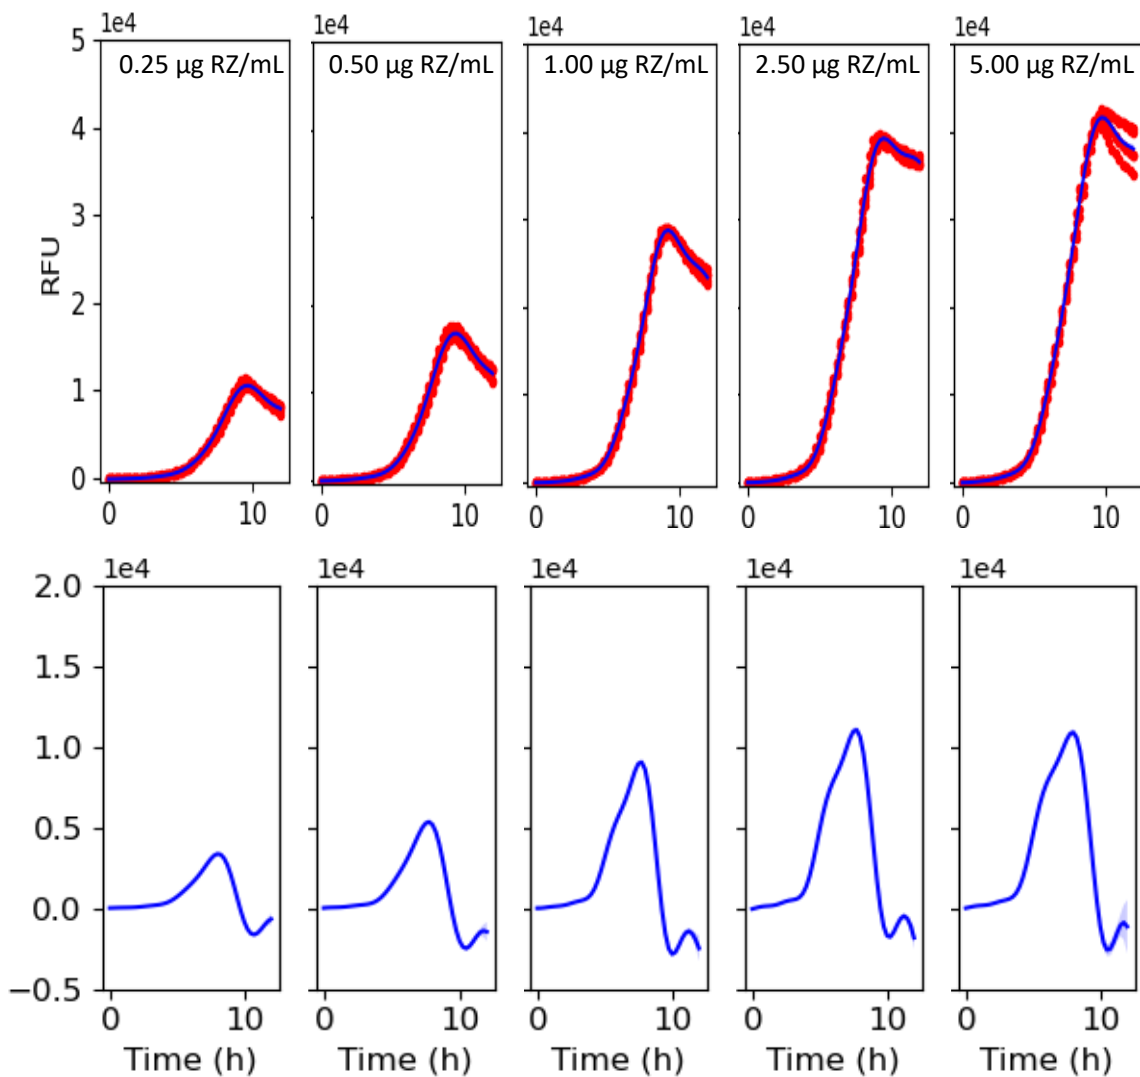Initial bacterial load:  $2.0 \cdot 10^7$  cfu/mL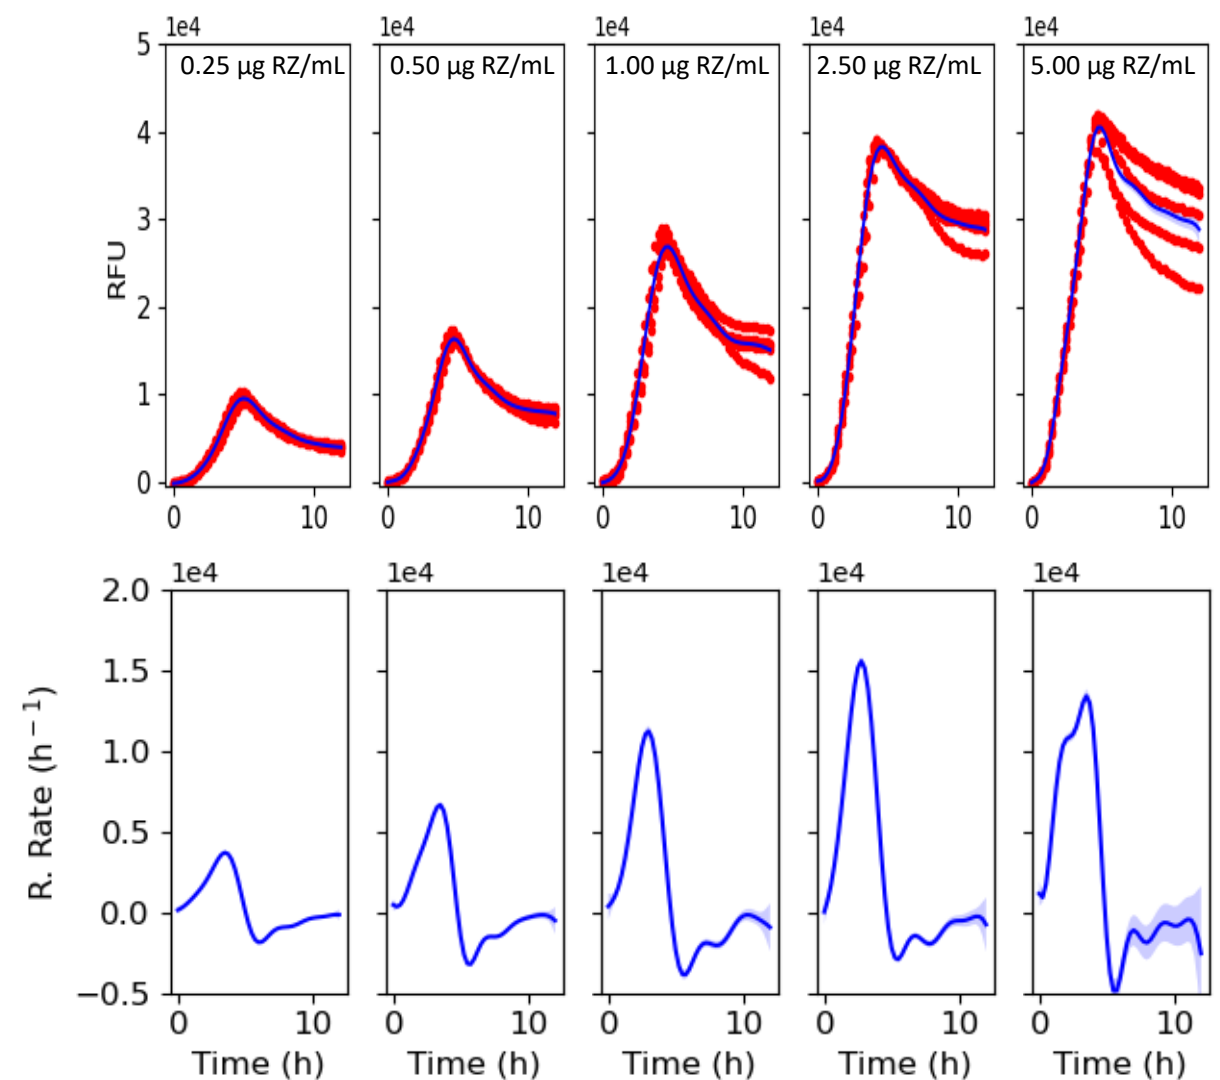

**Figure S2.** Resazurin reduction curves, model fits and time derivatives for two different inoculum densities ( $1.3 \cdot 10^6$  and  $2.0 \cdot 10^7$  cfu/mL) incubated in the medium with L-carnitine and different resazurin (RZ) concentrations. Upper panels: blank-subtracted RFU measured over 12 h. The red points show 10 replicates for each experimental condition. The blue line shows the non-parametric Gaussian process fit with standard error shown by the light blue area around the line. Lower panels: Estimated resazurin reduction rate as a function of time (time derivative).

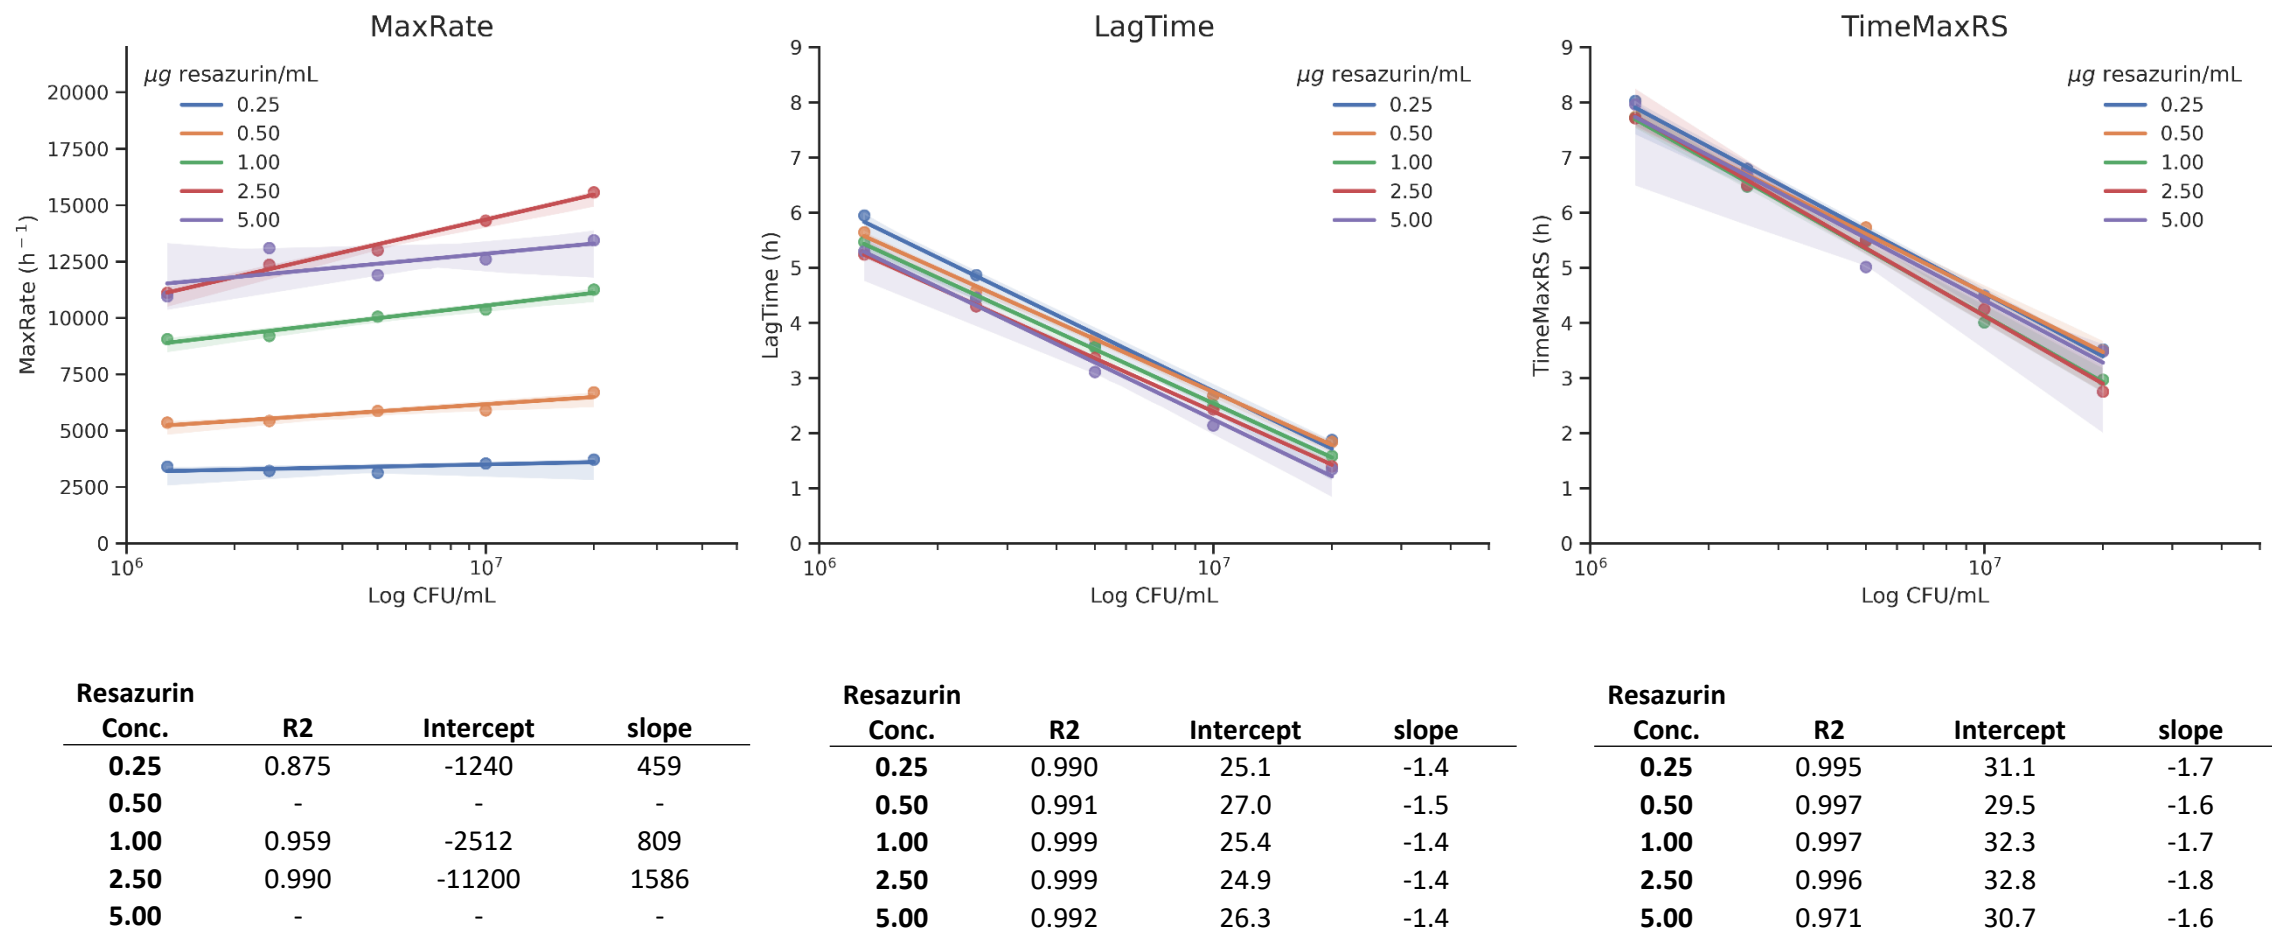

**Figure S3.** Regression analysis of model parameters as a function of Log CFU/mL.

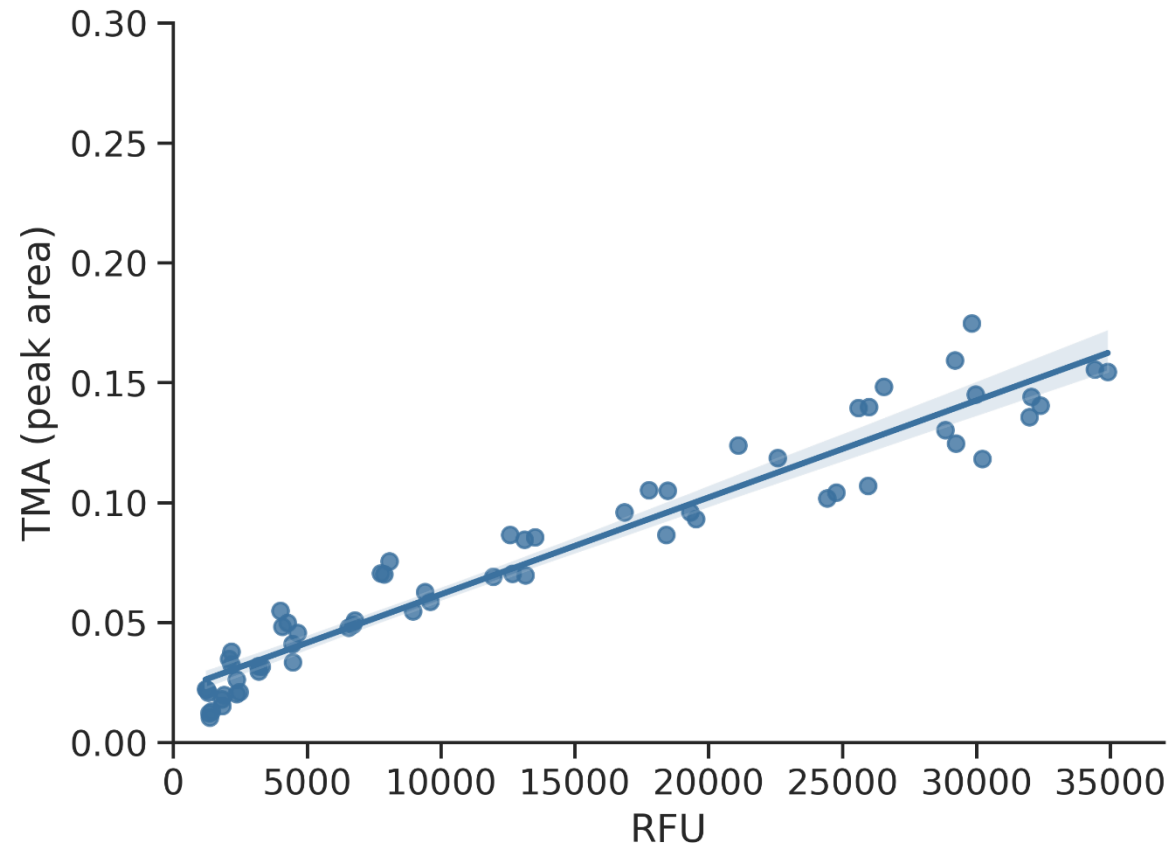

**Figure S4.** Correlation between TMA peak area and RFU measurements. The shadowed area around regression line represents the 95% confidence interval for the regression

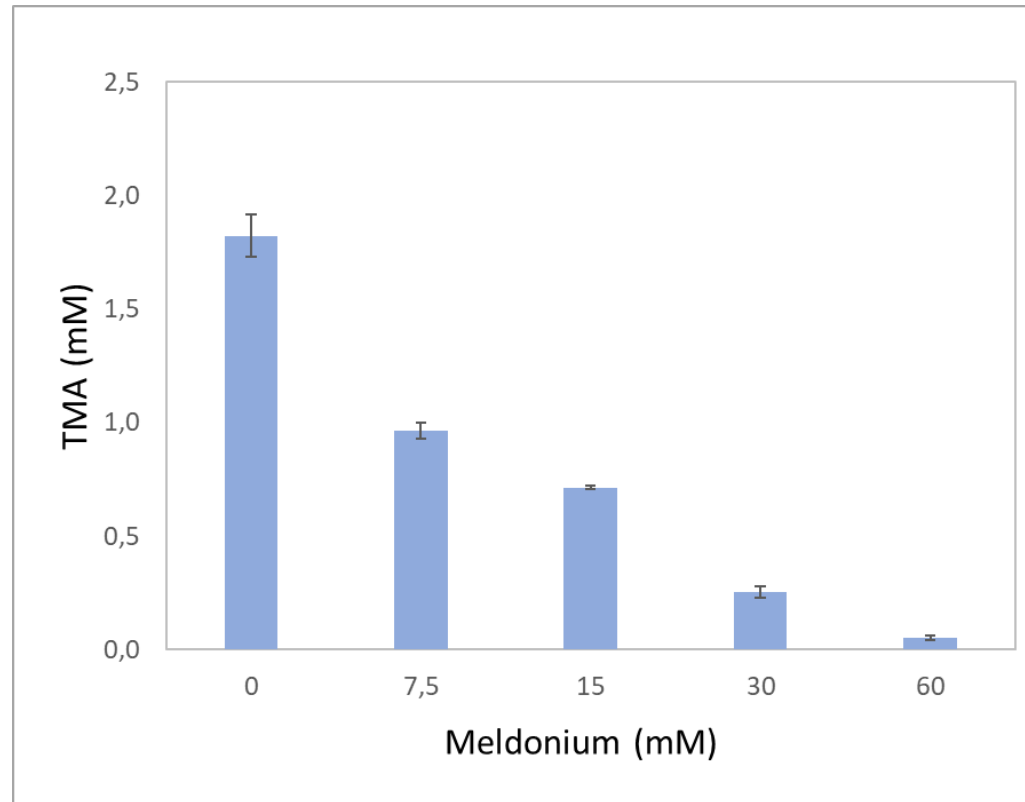

**Figure S5.** CE-UV quantification of TMA produced by *K. pneumoniae* at 8,5h in MD+C supplemented with different meldonium concentrations. The values represent the mean  $\pm$  SD (n=3).

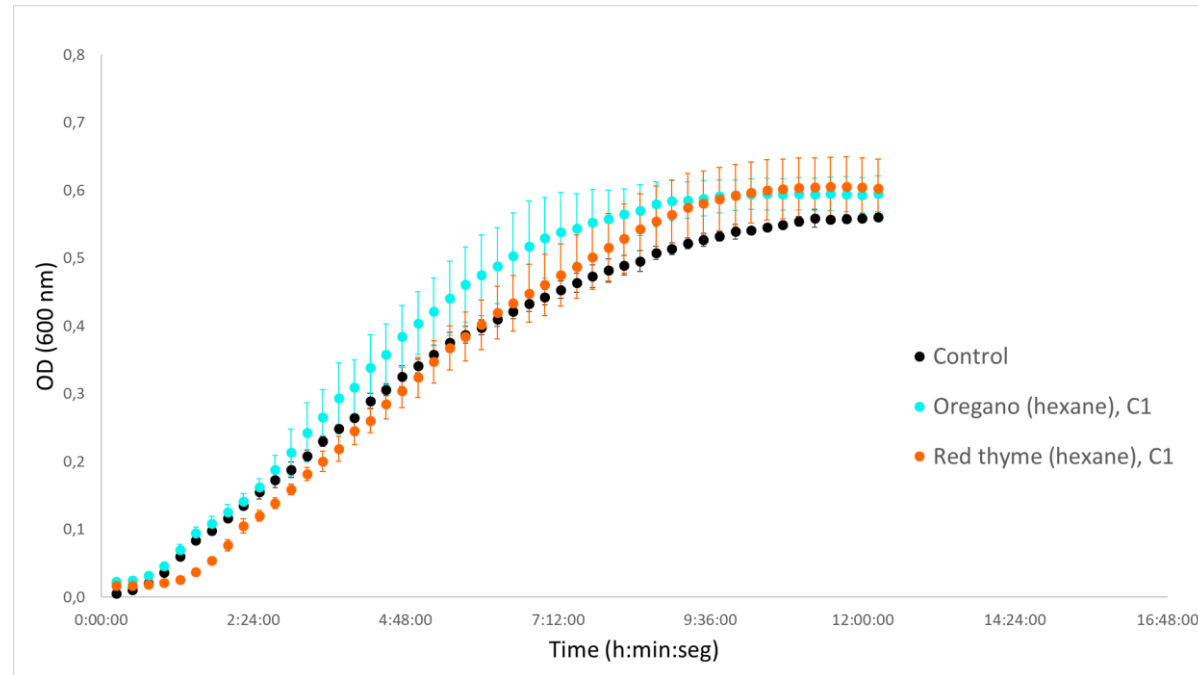

**Figure S6.** 12h growth curve (OD600) of *K. pneumoniae* incubated with in NB medium alone (control) or in presence of oregano and red thyme extracts. Values and bars represent the mean  $\pm$  SD (n=5).
